# Supplementary material for: Enhanced Adsorption of Methyl Orange from Aqueous Phase Using Chitosan–Palmer Amaranth Biochar Composite Microspheres
Source: MDPI journal article supplement (doi:10.3390/molecules29081836), 2024-04-18
Supplement: s1 [file s1]

## Supplementary Materials

### Enhanced Adsorption of Methyl Orange from Aqueous Phase Using

#### Chitosan-Palmer Amaranth Biochar Composite Microspheres

School of Biological Science, Jining Medical University, No. 669 Xueyuan Road, Donggang District,

Rizhao 276826, China; chenguiling@mail.jnmc.edu.cn (G.C.); yytsdml@163.com (Y.Y.); 13589619982@163.com (X.Z.);

13310637723@163.com (A.Q.); pan2071078420@163.com (X.P.)

\* Correspondence: liufei092531@mail.jnmc.edu.cn (F.L.); ruili061289@163.com or ruili061289@mail.jnmc.edu.cn

(R.L.)

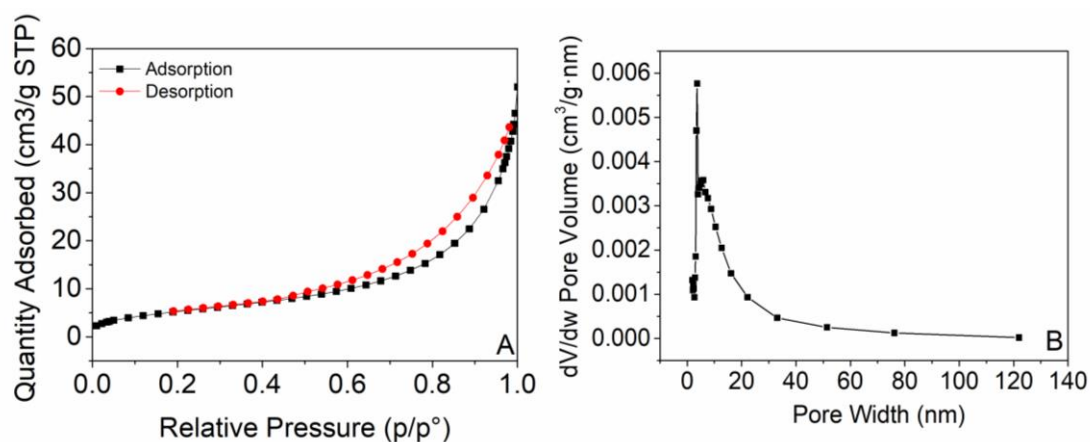

Figure S1. Isotherm linear plot of chitosan- Palmer amaranth biochar composite microspheres (A); BJH desorption  $dV/dw$  pore volume plot of chitosan- Palmer amaranth biochar composite microspheres (B).
